# Supplementary material for: Ring finger protein 43 associates with gastric cancer progression and attenuates the stemness of gastric cancer stem-like cells via the Wnt-β/catenin signaling pathway
Source: PubMed Central journal article supplement (PMC5406878; doi:10.1186/s13287-017-0548-8), 2017-04-26
Supplement: 13287_2017_548_MOESM1_ESM.pdf [file 13287_2017_548_MOESM1_ESM.pdf]

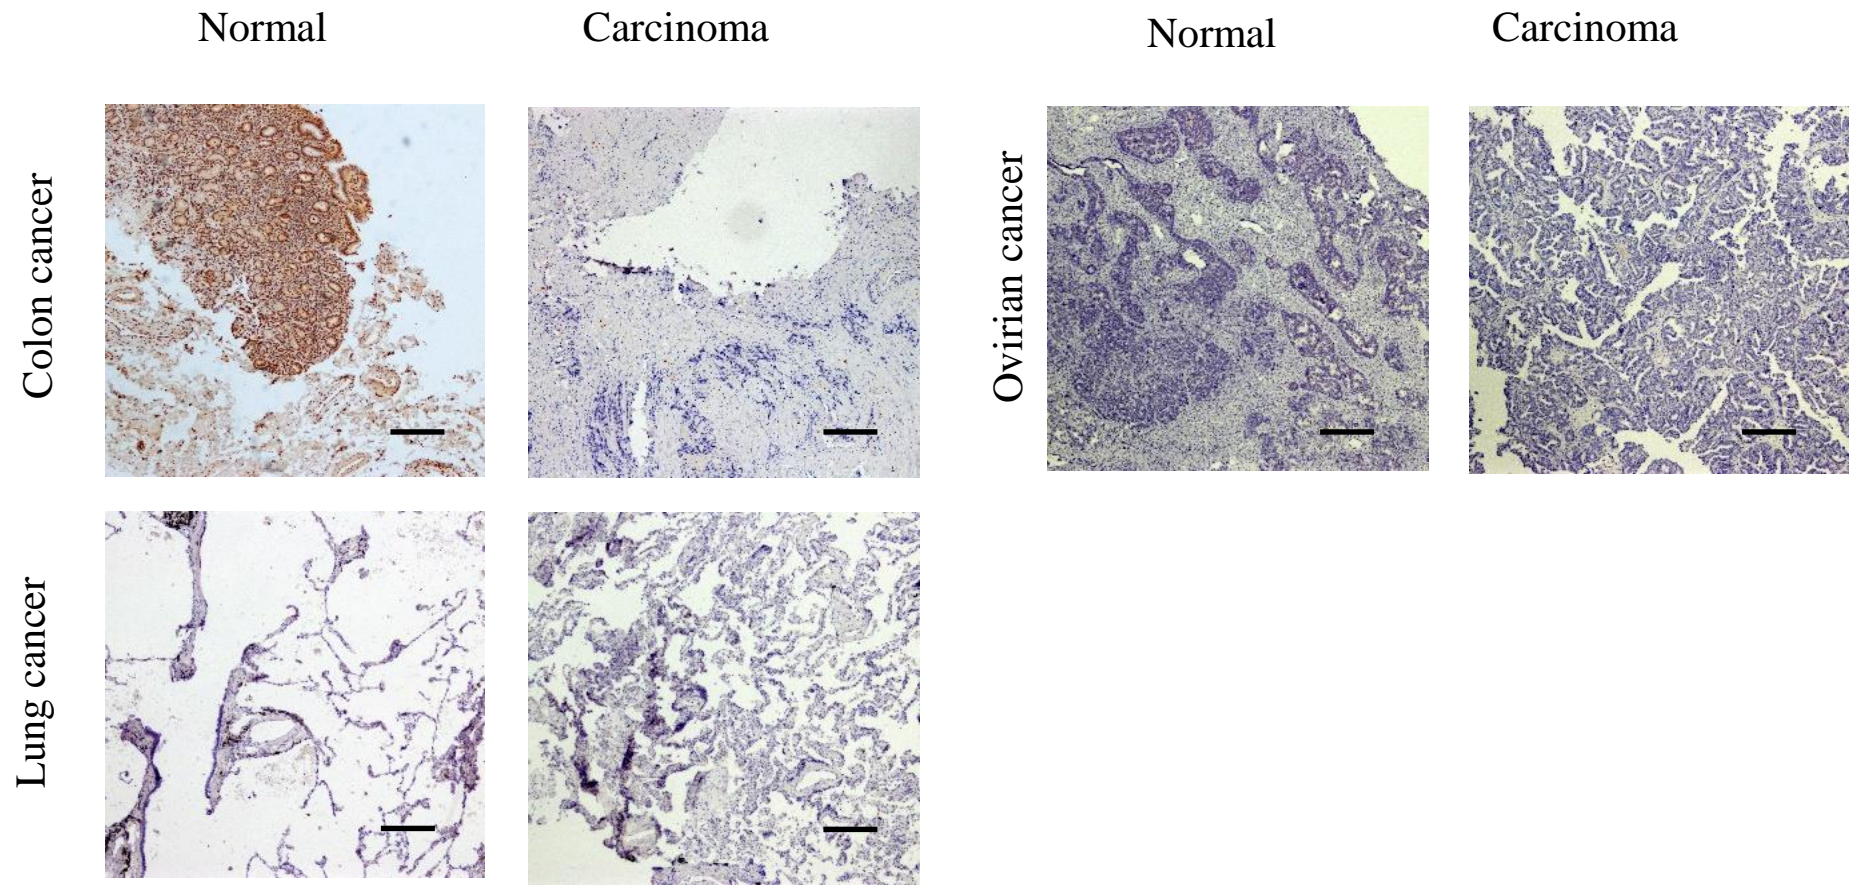

Fig. S1 IHC images of RNF43 in colon cancer, ovarian cancer, lung cancer and their corresponding normal tissues. (Scale bar, 10 $\mu$ m in black)
